# Supplementary material for: Improved Endpoints for Cancer Immunotherapy Trials
Source: PubMed Central journal article supplement — J Natl Cancer Inst. 2010 Sep 22;102(18):1388–97. doi: 10.1093/jnci/djq310 (PMC2943524; doi:10.1093/jnci/djq310), 2010-09-22
Supplement: supp_djq310_jnci-JNCI-09-1640-s01.pdf [file supp_djq310_jnci-JNCI-09-1640-s01.pdf]

AMERICAN SOCIETY OF CLINICAL ONCOLOGY LICENSE  
TERMS AND CONDITIONS

May 19, 2009

---

This is a License Agreement between Cancer Research Institute ("You") and American Society of Clinical Oncology ("American Society of Clinical Oncology") provided by Copyright Clearance Center ("CCC"). The license consists of your order details, the terms and conditions provided by American Society of Clinical Oncology, and the payment terms and conditions.

**All payments must be made in full to CCC. For payment instructions, please see information listed at the bottom of this form.**

|                                          |                                                                                                                                                                          |
|------------------------------------------|--------------------------------------------------------------------------------------------------------------------------------------------------------------------------|
| License Number                           | 2192561364430                                                                                                                                                            |
| License date                             | May 19, 2009                                                                                                                                                             |
| Licensed content publisher               | American Society of Clinical Oncology                                                                                                                                    |
| Licensed content publication             | The Journal of Clinical Oncology                                                                                                                                         |
| Licensed content title                   | Placebo-Controlled Phase III Trial of Immunologic Therapy with Sipuleucel-T (APC8015) in Patients with Metastatic, Asymptomatic Hormone Refractory Prostate Cancer       |
| Licensed content author                  | Eric J. Small, Paul F. Schellhammer, Celestia S. Higano, Charles H. Redfern, John J. Nemunaitis, Frank H. Valone, Suleman S. Verjee, Lori A. Jones, Robert M. Hershsberg |
| Licensed content date                    | Jul 1, 2006                                                                                                                                                              |
| Type of Use                              | Journal/Magazine/Newsletter                                                                                                                                              |
| Requestor type                           | Non-profit                                                                                                                                                               |
| Format                                   | Print and electronic                                                                                                                                                     |
| Portion                                  | Figure/table                                                                                                                                                             |
| Number of copies                         | 40000                                                                                                                                                                    |
| Title of new article                     | Improved Endpoints for Cancer Immunotherapy Trials                                                                                                                       |
| Publisher of new article                 | ASCO                                                                                                                                                                     |
| Author of new article                    | Hoos et al.                                                                                                                                                              |
| Expected publication date of new article | Oct 2009                                                                                                                                                                 |
| Estimated size of new article (pages)    | 10                                                                                                                                                                       |
| Billing Type                             | Invoice                                                                                                                                                                  |
| Company                                  | Cancer Research Institute                                                                                                                                                |
| Billing Address                          | Cancer Research Institute<br>One Exchange Plaza<br>New York, NY 10006<br>United States                                                                                   |
| Customer reference info                  |                                                                                                                                                                          |
| Total                                    | 103.50 USD                                                                                                                                                               |
| Terms and Conditions                     |                                                                                                                                                                          |

**General Terms & Conditions**

**Permission is granted upon the requester's compliance with the following terms and conditions:**

1. A credit line will be prominently placed in your product(s) and include: for books-the

author, book title, editor, copyright holder, year of publication; for journals-the author, title of article, title of journal, volume number, issue number, and the inclusive pages. The credit line must include the following wording: "Reprinted with permission. © 2008 American Society of Clinical Oncology. All rights reserved." The citation format must be as follows: Author last name, first initial et al: J Clin Oncol (or substitute appropriate title) Vol. (Issue), Year: Page-Page.

2. The requester warrants that the material shall not be used in any manner that may be derogatory to the title, content, or authors of the material or to ASCO, including but not limited to an association with (i) conduct that is fraudulent or otherwise illegal; or (ii) the use or abuse of alcohol, cigarettes, or illegal drugs.

3. Permission is granted for the term (for Books/CDs-Shelf Life; for Internet/Intranet-In perpetuity; for all other forms of print-the life of the title) and purpose specified in your request. Once term has expired, permission to renew must be made in writing.

4. Permission granted is nonexclusive, and is valid throughout the world in English and the languages specified in your original request. A new permission must be requested for revisions of the publication under current consideration.

5. ASCO cannot supply the requester with the original artwork or a "clean copy."

6. If the ASCO material is to be translated, the following lines must be included: The authors, editors, and ASCO are not responsible for errors or omissions in translations.

v1.2

Gratis licenses (referencing \$0 in the Total field) are free. Please retain this printable license for your reference. No payment is required.

If you would like to pay for this license now, please remit this license along with your payment made payable to "COPYRIGHT CLEARANCE CENTER" otherwise you will be invoiced within 30 days of the license date. Payment should be in the form of a check or money order referencing your account number and this license number 2192561364430.

If you would prefer to pay for this license by credit card, please go to <http://www.copyright.com/creditcard> to download our credit card payment authorization form.

**Make Payment To:**  
Copyright Clearance Center  
Dept 001  
P.O. Box 843006  
Boston, MA 02284-3006

If you find copyrighted material related to this license will not be used and wish to cancel, please contact us referencing this license number 2192561364430 and noting the reason for cancellation.

Questions? [customercare@copyright.com](mailto:customercare@copyright.com) or +1-877-622-5543 (toll free in the US) or +1-978-646-2777.

---

---

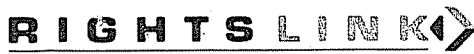

Copyright Clearance Center  
222 Rosewood Drive, Danvers, MA 01923

# INVOICE

Invoice Date: May 31, 2009  
Account Number: 3000180035  
Invoice Number: **RLNK10622466**  
Terms: Due Upon Receipt  
Federal ID: 13-2922432

187137 0 1903-1

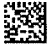

Axel Hoos  
Cancer Research Institute  
Cancer Research Institute  
One Exchange Plaza  
New York NY 10006

Thank you for placing an order to obtain permission and/or reprints via Copyright Clearance Center's Rightslink service. This invoice references an unpaid order licensed during the month of May 2009. If payment has been submitted, please disregard this notice. An email version of this invoice has already been sent to [axel.hoos@bms.com](mailto:axel.hoos@bms.com).

License No: 2192561364430  
License Date: May 19, 2009  
License Type: Journal/Magazine/Newsletter  
Portion: Figure/table  
Publisher: American Society of Clinical Oncology  
Publication: The Journal of Clinical Oncology  
Author: Eric J. Small, Paul F. Schellhammer, Celestia S. Higano, Charles H. Redfern, John J. Nemunaitis, Frank H. Valone, Suleman...  
Title: Placebo-Controlled Phase III Trial of Immunologic Therapy with Sipuleucel-T (APC8015) in Patients with Metastatic,...  
Quantity: 40000  
Total Amt: \$103.50 USD

---

**Total Amount Due: \$103.50 USD**

---

*Note: Zero dollar licenses, additional invoices, and account information can be accessed at <https://myaccount.copyright.com>.*

Please remit this Invoice along with your payment payable to **COPYRIGHT CLEARANCE CENTER**. Payment should be in the form of a check or money order referencing your account number **3000180035**.

If you would prefer to pay this invoice by credit card, please go to <http://www.copyright.com/creditcard> to download our credit card payment authorization form.

**Copyright Clearance Center**  
Dept 001  
P.O. Box 843006  
Boston, MA 02284-3006 USA

Questions? [customer@copyright.com](mailto:customer@copyright.com) or +1-877-622-5543 or +1-978-646-2777.

G.3:v2.0-p

To: Copyright Clearance Center

6/10/2009

Vendor ID: 9165

CANCER RESEARCH INSTITUTE

| INVOICE NUMBER | DATE      | DESCRIPTION                         | AMOUNT          | DISCOUNT      | NET AMOUNT      |
|----------------|-----------|-------------------------------------|-----------------|---------------|-----------------|
| RLNK10622466   | 6/10/2009 | CV Consortium - Journal Publication | \$103.50        | \$0.00        | \$103.50        |
| <b>Totals:</b> |           |                                     | <b>\$103.50</b> | <b>\$0.00</b> | <b>\$103.50</b> |

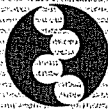

**CANCER RESEARCH INSTITUTE**

One Exchange Plaza, 55 Broadway, Suite 1802  
New York, NY 10006

JP MORGAN CHASE BANK  
770 LEXINGTON AVENUE  
NEW YORK, NY 10022  
50-177-223

079823

CHECK DATE: 6/10/2009  
CHECK NO: 79823

CHECK AMOUNT

\$\*\*103.50

\*\*One hundred three and 50/100 Dollars\*\*

PAY TO THE ORDER OF

Copyright Clearance Center  
Dept 001  
P.O. Box 843006  
Boston, MA 02284-3006

AUTHORIZED SIGNATURES

⑆079823⑆ ⑆022300⑆ 73⑆904950646⑆
