# Supplementary material for: Improved Endpoints for Cancer Immunotherapy Trials
Source: PubMed Central journal article supplement — J Natl Cancer Inst. 2010 Sep 22;102(18):1388–97. doi: 10.1093/jnci/djq310 (PMC2943524; doi:10.1093/jnci/djq310), 2010-09-22
Supplement: supp_djq310_jnci-JNCI-09-1640-s02.pdf [file supp_djq310_jnci-JNCI-09-1640-s02.pdf]

# Journal of the National Cancer Institute

Oxford University Press • 8120 Woodmont Ave., Suite 500 • Bethesda, MD 20814

Fax: 301-841-1297 • E-mail: [jncimanuscripts@oxfordjournals.org](mailto:jncimanuscripts@oxfordjournals.org)

## CONSENT TO PAY FOR REPRODUCTION OF COLOR FIGURES

**CORRESPONDING AUTHOR:** Please print this form, complete either **Part A** or **B** below, sign, and return the form to the Journal office by fax or express mail.

MS No.: JNCI-09-1640

Title: Improved Endpoints for Cancer Immunotherapy Trials

First Author: Axel Hoos

Corresponding Author (name, e-mail, phone): AXEL HOOS, axel.hoos@bms.com, 203 430 2306

**A)** There are no figures to print in color.

**B)** Please print 2 (number) Figures in color. The following Figures should be reproduced in color: Figure 1, Figure 4 (list figure numbers in final version of manuscript, e.g., Fig. 3, Fig. 4A). I understand that I will be charged US \$600 per figure.

Signature

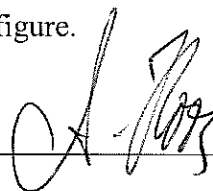

Name (please print)

AXEL HOOS

Send invoice for color printing to:

AXEL HOOS

5 Research Parkway

Wallingford, CT 06492

axel.hoos@bms.com (E-mail address if different than above)

203 430 2306 (Phone number if different than above)

# Journal of the National Cancer Institute

Oxford University Press • 8120 Woodmont Ave., Suite 500 • Bethesda, MD 20814

Fax: 301-841-1297 • E-mail: [jncimanuscripts@oxfordjournals.org](mailto:jncimanuscripts@oxfordjournals.org)

## Permission and Compliance Checklist

Manuscript No. JNCI-09-1640

**CORRESPONDING AUTHOR:** Please print this form, complete **Parts 1, 2, and 3** below, and return the form to the Journal office by fax or express mail.

(1) You must submit written permission from the following parties (check as appropriate):

- a) One author of any work cited as a personal communication, unpublished data, or a manuscript in preparation, submitted for publication, or in press.
- b) The copyright holder (usually a journal) of any previously published table or illustration, giving authorization to reprint or to print an adapted version.
- c) Any person named in acknowledgements who has been credited with a substantive scientific contribution to the work (e.g., a supplier of cell lines).
- None of the above applies.

(2) Manuscripts reporting on biomedical studies involving human subjects must include the following (check as appropriate):

- a) Explicit assurance that written, informed consent was obtained from each subject or from his or her guardian.
- b) A statement that the investigations were approved by a specific local institutional review board and, when appropriate, in accord with an assurance filed with and approved by the U.S. Department of Health and Human Services.
- Neither of the above applies.

(3) Any study involving experiments with animals must state the following (check as appropriate):

- a) Their care was in accord with institutional guidelines.
- b) Where applicable, the dose and schedule of anesthetics and analgesics.
- Neither of the above applies.

\_\_\_\_\_  
Corresponding Author Signature

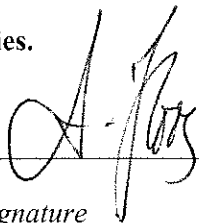

\_\_\_\_\_  
Date

02-24-10

# Journal of the National Cancer Institute

Oxford University Press • 8120 Woodmont Ave., Suite 500 • Bethesda, MD 20814

Fax: 301-841-1297 • E-mail: [jncimanuscripts@oxfordjournals.org](mailto:jncimanuscripts@oxfordjournals.org)

## Corresponding Author Declarations; Instructions for Conflict of Interest Form

Manuscript No. JNCI-09-1640

**CORRESPONDING AUTHOR:** Please make copies of the conflict of interest form, a separate copy for each author of the manuscript. (You may wish to circle a different author's name on each copy.) Verify that each author has completed part I or II of the conflict of interest form. It is a condition of publication that all authors complete the conflict of interest form. Please keep a copy of the completed forms. Return all forms together by express mail to Suite 500, 8120 Woodmont Ave., Bethesda, MD 20814, by fax to 301-841-1299, or by e-mail to [jncimanuscripts@oxfordjournals.org](mailto:jncimanuscripts@oxfordjournals.org).

YOUR MANUSCRIPT **WILL NOT BE PROCESSED** IF ALL CONFLICT OF INTEREST FORMS ARE NOT RECEIVED. MAKE SURE EACH AUTHOR HAS COMPLETED HIS/HER FORM.

**PLEASE RETURN BOTH PAGES OF THIS FORM, EVEN IF SECTIONS ON ONE PAGE DO NOT APPLY.**

1. You must complete this section if representatives (e.g., officials or attorneys) of a business, foundation, or special interest group authored, co-authored, edited, reviewed, or approved all or part of this manuscript.

Cancer Vaccine Consortium, Cancer Research Institute

Name of business, foundation, group

Corresponding author's signature

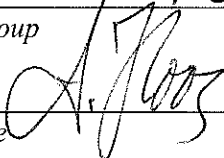

Date

02-24-10

2. For research and non-research papers: If there have been **no changes in authorship** since original submission, you, as the corresponding author, should indicate as such, by signing below:

Corresponding author's signature

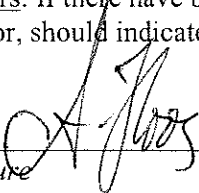

Date

02-24-10

3. Note the following if there have been any **changes in authorship**:

- (a) For research papers and non-research papers: If an author's **name has been removed** since the original manuscript submission, please ask that person to send you a brief statement saying that he or she knows the name was removed and that he or she approves the change. Send the statement to us with the manuscript's completed Conflict of Interest forms.

REMOVED author name(s) (typed or printed)

N/A

(b) For research papers: If one or more author **names have been added** since the original manuscript submission, you, as corresponding author, should affirm the following regarding the added author(s):

N/A

---

*ADDED author name(s) (typed or printed)*

The author(s) named above has/have directly participated in the planning, execution, or analysis of the study and has/have approved the current version.

---

*Corresponding author's signature*

*Date*

(c) For non-research papers (including Correspondence not requiring original research): If one or more author **names have been added** since the original manuscript submission, you, as corresponding author, should affirm the following regarding the added author(s):

N/A

---

*ADDED author name(s) (typed or printed)*

The author(s) named above has/have directly participated in the drafting of this manuscript and has/have approved the current version.

---

*Corresponding author's signature*

*Date*

**PLEASE RETURN BOTH PAGES OF THIS FORM, EVEN IF SECTIONS ON ONE PAGE DO NOT APPLY.**
